# Supplementary material for: The Low Prevalence of Overweight and Obesity in Czech Breastfed Infants and Young Children: An Anthropological Survey
Source: MDPI journal article supplement (doi:10.3390/ijerph16214198), 2019-10-30
Supplement: s1 [file s1]

## Research on child growth in relation to infant feeding

Instructions for GP pediatricians: When filling in the questionnaire, please write the relevant data in the grey field or choose the proper answer and cross **only one answer**.

|                                                                                        |                                                         |                 |  |     |
|----------------------------------------------------------------------------------------|---------------------------------------------------------|-----------------|--|-----|
| <b>Address of the facility</b> where the parent was contacted:<br><br><b>Zip code:</b> | <b>No. of inhabitants in the residence of the child</b> | Up to 4,999     |  | (1) |
|                                                                                        |                                                         | 5,000–49,999    |  | (2) |
|                                                                                        |                                                         | 50,000 and more |  | (3) |

### *Identification data of the child*

|                                   |        |       |            |      |  |     |                                 |       |  |     |
|-----------------------------------|--------|-------|------------|------|--|-----|---------------------------------|-------|--|-----|
| <b>First name of the child</b>    |        |       |            |      |  |     |                                 |       |  |     |
| <b>Date of birth of the child</b> |        |       | <b>Sex</b> | boy  |  | (1) | <b>Nationality of the child</b> | Czech |  | (1) |
| day:                              | month: | year: |            | girl |  | (2) |                                 | other |  | (2) |

### *Data of the mother*

|   |                              |                             |  |  |       |     |
|---|------------------------------|-----------------------------|--|--|-------|-----|
| 1 | Age of the mother            |                             |  |  | years |     |
| 2 | Body height of the mother    |                             |  |  | cm    |     |
| 3 | Body weight of the mother    |                             |  |  | kg    |     |
| 4 | Family status of the mother  | married                     |  |  |       | (1) |
|   |                              | divorced                    |  |  |       | (2) |
|   |                              | single                      |  |  |       | (3) |
| 5 | Education (highest attained) | primary                     |  |  |       | (1) |
|   |                              | vocational                  |  |  |       | (2) |
|   |                              | secondary and postsecondary |  |  |       | (3) |
|   |                              | bachelor                    |  |  |       | (4) |
|   |                              | master                      |  |  |       | (5) |
| 6 | Smoking status of the mother | never smoked                |  |  |       | (1) |
|   |                              | quitted before pregnancy    |  |  |       | (2) |
|   |                              | quitted during pregnancy    |  |  |       | (3) |
|   |                              | quitted after birth         |  |  |       | (4) |
|   |                              | current smoker              |  |  |       | (5) |

### *Data on child birth*

|    |                                                                |  |  |  |      |
|----|----------------------------------------------------------------|--|--|--|------|
| 7  | Birth order (of the child of the biological mother)            |  |  |  |      |
| 8  | Gestational age (at what week of pregnancy was the child born) |  |  |  | week |
| 9  | Birth weight of the child                                      |  |  |  | g    |
| 10 | Birth length of the child                                      |  |  |  | cm   |
